# Supplementary material for: Delayed Remote Ischemic Preconditioning ConfersRenoprotection against Septic Acute Kidney Injury via Exosomal miR-21
Source: PubMed Central journal article supplement — Theranostics. 2019 Jan 1;9(2):405–23. doi: 10.7150/thno.29832 (PMC6376188; doi:10.7150/thno.29832), 2019-01-01
Supplement: thnov09p0405s1.pdf [file thnov09p0405s1.pdf]

# Supplementary Materials

## 1. Supplemental Figures and Legends

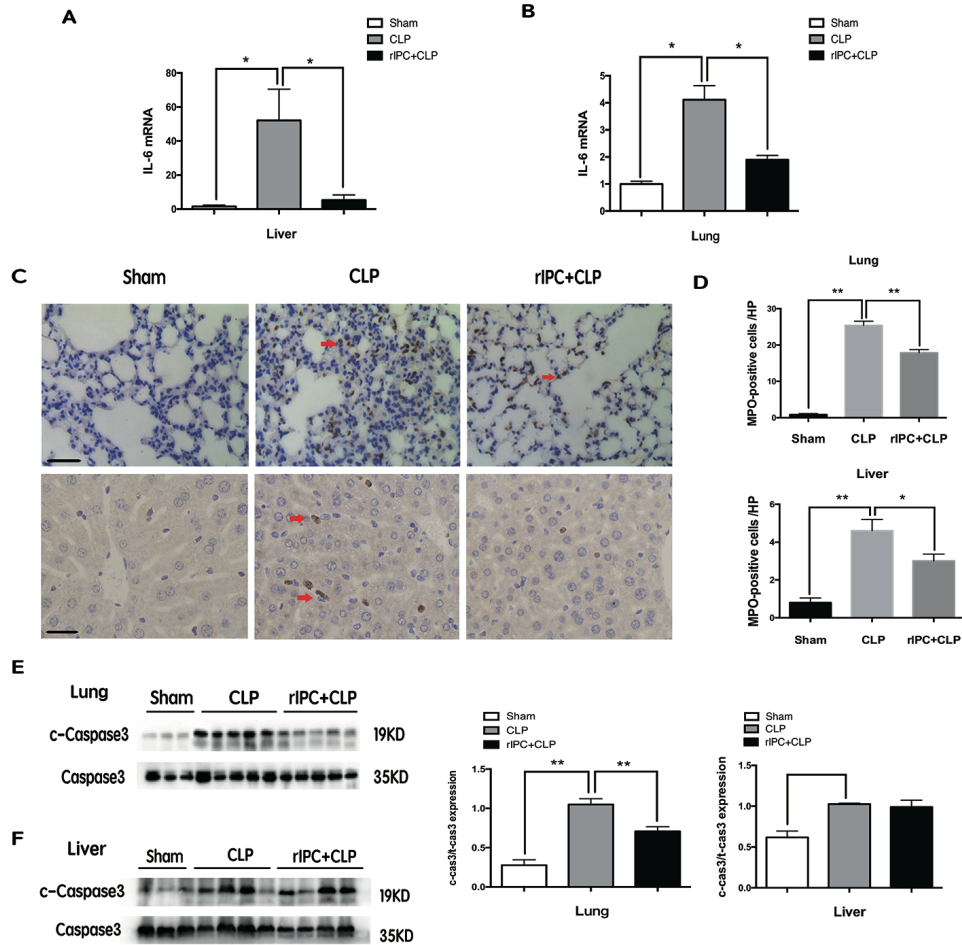

**Figure S1.**

**Figure S1. Limb ripc effectively ameliorated inflammatory injury and cell apoptosis induced by CLP in multi-organs.** A and B, mRNA level of IL-6 and TNF- $\alpha$  in lungs and livers in different groups. C and D, MPO-positive staining for inflammatory cell infiltration in lungs and livers in different groups. (magnification  $\times 400$ ). E and F, Western blot analysis of cleaved-caspase 3 (c-caspase 3) in lungs and livers in different groups. ( $n \geq 3$ ). \* $p < 0.05$  and \*\* $p < 0.01$ . Data are the mean  $\pm$  SEM.

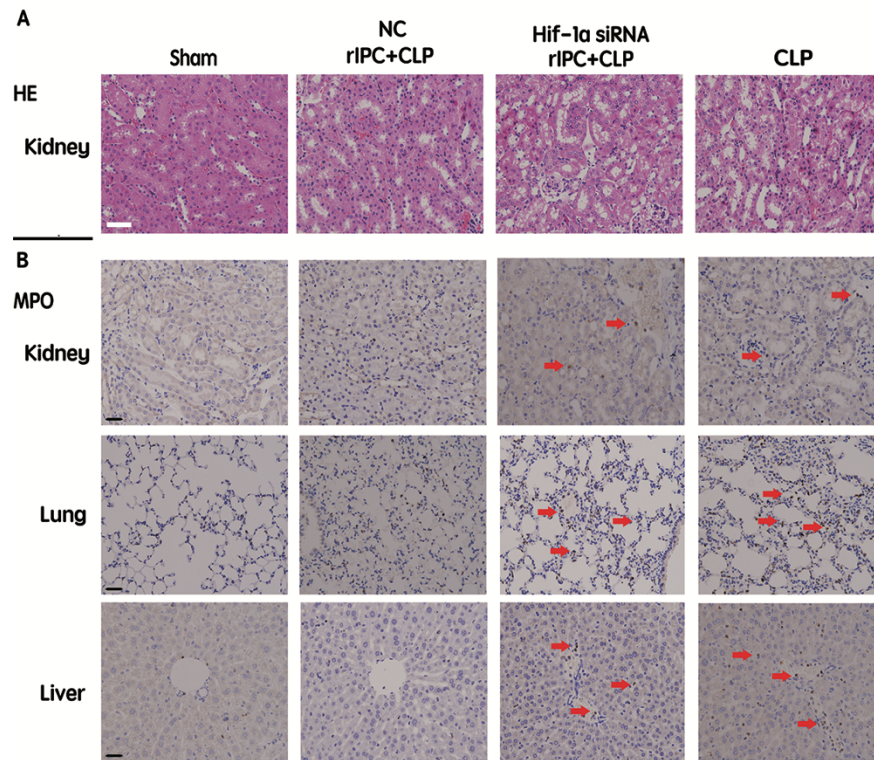

**Figure S2.**

**Figure S2. HIF-1 $\alpha$  siRNA inhibited the protective effect of limb rIPC against CLP injury in multi-organs.** A, compared to NC prior to rIPC, HIF-1 $\alpha$  siRNA administration aggravated the vacuolization of renal tubular cells induced by CLP, especially in the outer strip of the outer medulla. B, By MPO staining assay, increased number of MPO-positive cells induced by CLP were detected in kidney, lung and liver of the mice with HIF-1 $\alpha$  siRNA prior to rIPC, when compared with NC group. (magnification  $\times 200$ ).

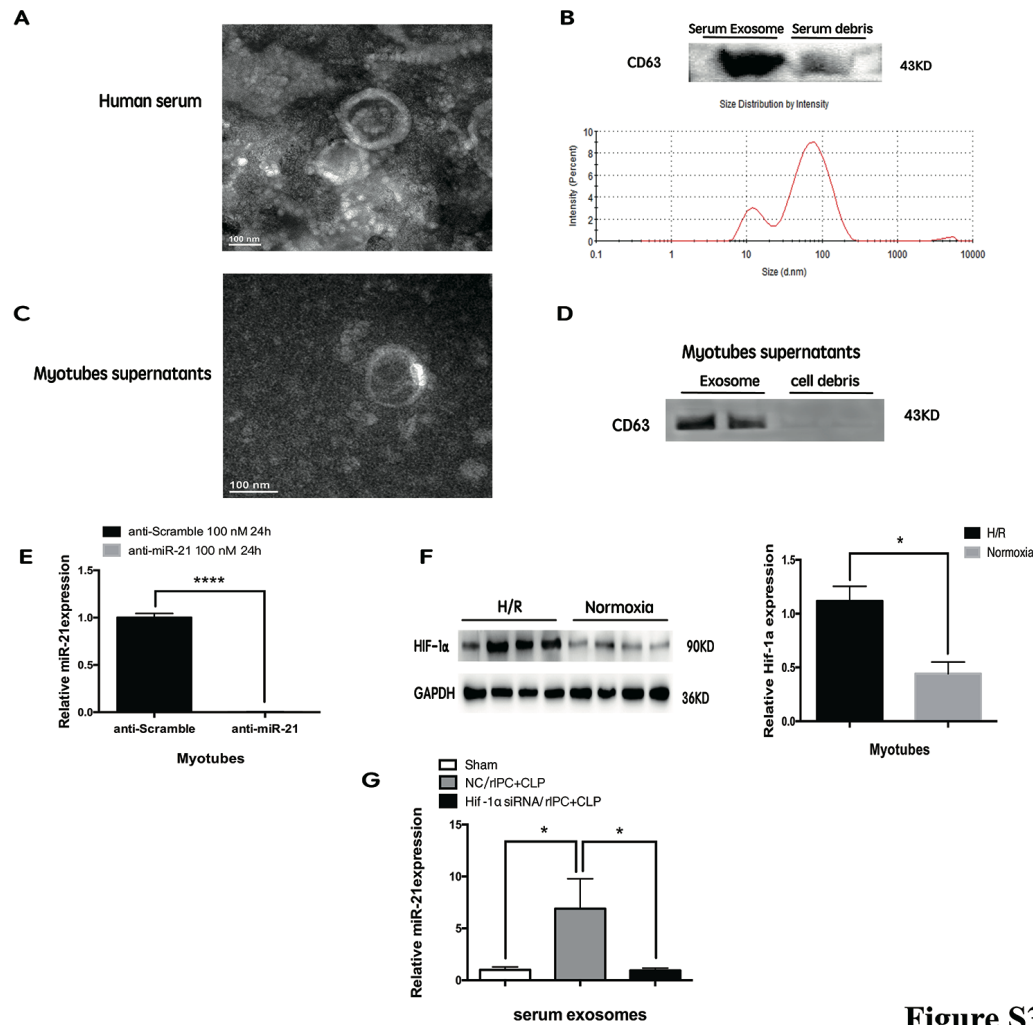

**Figure S3.**

**Figure S3. Identification of exosomes and evaluation of miR-21/HIF-1 $\alpha$  expression.**

A and B, the vesicles fraction extracted from human serum were identified as exosomes by TEM analysis and immunoblot assay; the size of the vesicles were distributed between 50-100nm. C and D, identification of exosomes derived from myotubes supernatants by TEM and immunoblot assay. E-G, C2C12 cells were differentiated into myotubes with conditional medium and then subjected to hypoxia for 6 hrs or 24 hrs followed by re-oxygen for 4 hrs (H/R). E, miR-21 level in differentiated C2C12 cells (myotubes). H/R increased the miR-21 content in cells at two time points, and the increase was prominent at 24 hrs. (n = 4). F, HIF-1 $\alpha$  expression in myotubes. HIF-1 $\alpha$  expression was up-regulated in the H/R group compared with the normoxia group. (n = 4). G, miR-21 expression in serum exosomes. HIF-1 $\alpha$  knock-down inhibited miR-21 expression in mouse serum exosomes, although the pretreatment of limb rIPC. (n = 4). \*p < 0.05 and \*\*p < 0.01. Data are the mean  $\pm$  SEM.

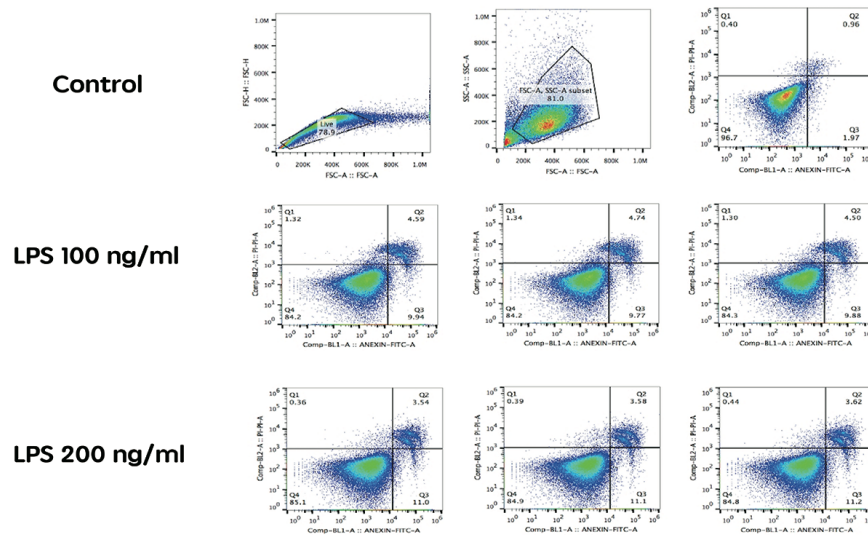

**Figure S4.**

**Figure S4. 100ng/ml LPS was sufficient to trigger apoptosis injury in mouse renal tubular epithelial cells (mTECs).** A, Annexin V/PI dual staining for cell apoptosis measurements. Representative density plots of cell apoptosis are shown after staining. The proportion of apoptotic cells is represented for both early (Annexin V+/PI-) and late (Annexin V+/PI+) apoptotic cells after the administration of LPS, in comparison with the proportions of live cells (Annexin V-/PI-). The results indicated that 100ng/ml was sufficient to trigger the apoptosis of mTECs. \* $p < 0.05$  and \*\* $p < 0.01$ . Data are the mean  $\pm$  SEM.

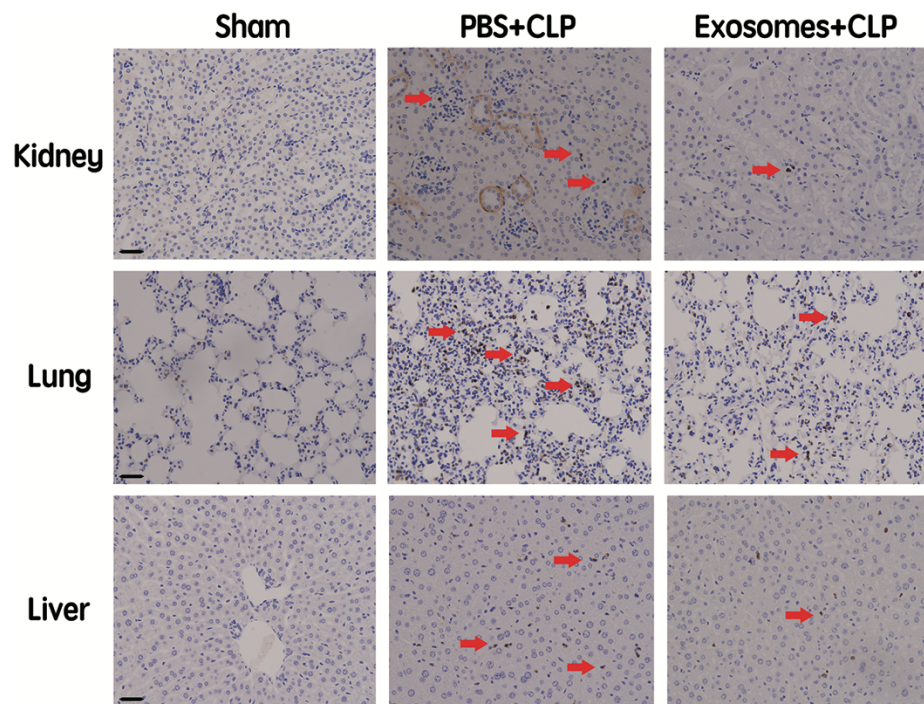

**Figure S5.**

**Figure S5. Exosomes from H/R myotubes infusion rescued  $\text{miR21}^{-/-}$  mice from pro-inflammatory cells infiltration in multi-organs.** MPO-positive staining for inflammatory cell infiltration in kidneys, lungs and livers at with exosomes infusion after CLP in  $\text{miR21}^{-/-}$  mice. (n = 4). (magnification  $\times 200$ ).

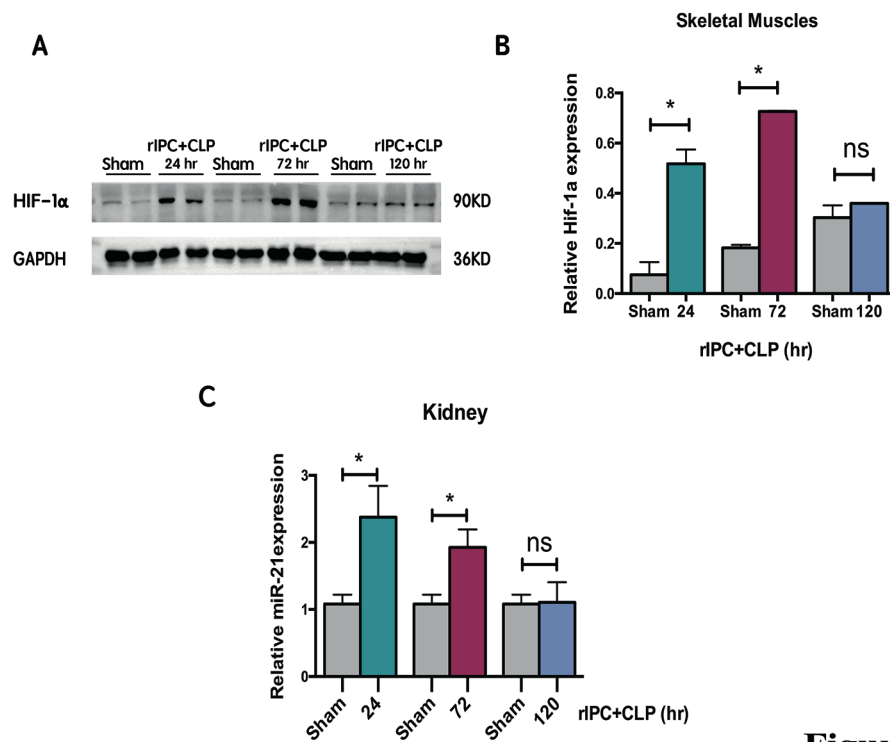

**Figure S6.**

**Figure S6. The duration of the protective effectors from limb rIPC.** We collected skeletal muscle tissues and renal tissues at 24, 72 and 120 h post rIPC+CLP. A and B, Immunoblot analysis of HIF-1a expression at different time points. (n = 6). C, Detection of miR-21 levels during the observed period in murine kidneys post rIPC+CLP (n = 6). \*p < 0.05, and \*\*p < 0.01. The data are presented as the mean ± SEM.

Table. Clinical information for volunteers

| Patient NO. | Sex    | Date of Birth |
|-------------|--------|---------------|
| 1           | Male   | 1991-02-25    |
| 2           | Female | 1987-03-07    |
| 3           | Male   | 1981-04-20    |
| 4           | Female | 1993-09-20    |
| 5           | Male   | 1995-07-31    |
| 6           | Female | 1990-12-20    |

*\*ALL the blood samples collected from the contralateral arm*
